# Supplementary material for: Potential and limits for rapid genetic adaptation to warming in a Great Barrier Reef coral
Source: PubMed Central journal article supplement (PMC5908067; doi:10.1371/journal.pgen.1007220), 2018-04-19
Supplement: pgen.1007220.s001.pdf [file pgen.1007220.s001.pdf]

| pop1 | pop2 | nu1.median | nu1.hi | nu1.lo | nu2.median | nu2.hi | nu2.lo | T.median | T.lo   | T.hi   | m12.median | m12.lo | m12.hi | m21.median | m21.lo | m21.hi |
|------|------|------------|--------|--------|------------|--------|--------|----------|--------|--------|------------|--------|--------|------------|--------|--------|
| W    | S    | 9800       | 5000   | 14000  | 8000       | 4200   | 14000  | 290000   | 110000 | 600000 | 0.0020     | 0.0008 | 0.0120 | 0.0060     | 0.0010 | 0.0130 |
| W    | O    | 12000      | 9600   | 14000  | 7600       | 4500   | 9900   | 300000   | 130000 | 700000 | 0.0017     | 0.0012 | 0.0021 | 0.0094     | 0.0061 | 0.0140 |
| W    | M    | 11000      | 7700   | 14000  | 8000       | 5500   | 12000  | 220000   | 110000 | 400000 | 0.0015     | 0.0009 | 0.0026 | 0.0065     | 0.0028 | 0.0110 |
| W    | K    | 14000      | 13000  | 16000  | 1900       | 1100   | 3100   | 130000   | 96000  | 180000 | 0.0005     | 0.0000 | 0.0008 | 0.0054     | 0.0031 | 0.0099 |
| S    | O    | 13000      | 8000   | 15000  | 11000      | 7400   | 14000  | 170000   | 96000  | 850000 | 0.0011     | 0.0003 | 0.0045 | 0.0096     | 0.0026 | 0.0150 |
| S    | M    | 14000      | 8800   | 15000  | 13000      | 7300   | 29000  | 140000   | 61000  | 720000 | 0.0009     | 0.0003 | 0.0025 | 0.0130     | 0.0053 | 0.0180 |
| S    | K    | 15000      | 13000  | 18000  | 1500       | 840    | 2700   | 150000   | 110000 | 300000 | 0.0004     | 0.0000 | 0.0018 | 0.0086     | 0.0043 | 0.0150 |
| O    | M    | 11000      | 2700   | 14000  | 11000      | 4900   | 16000  | 140000   | 60000  | 580000 | 0.0016     | 0.0008 | 0.0170 | 0.0090     | 0.0007 | 0.0130 |
| O    | K    | 15000      | 13000  | 19000  | 1800       | 750    | 2600   | 140000   | 94000  | 320000 | 0.0009     | 0.0005 | 0.0019 | 0.0068     | 0.0041 | 0.0170 |
| M    | K    | 18000      | 15000  | 21000  | 2800       | 830    | 3400   | 370000   | 120000 | 430000 | 0.0021     | 0.0012 | 0.0024 | 0.0041     | 0.0033 | 0.0170 |
