# Supplementary material for: Potential and limits for rapid genetic adaptation to warming in a Great Barrier Reef coral
Source: PubMed Central journal article supplement (PMC5908067; doi:10.1371/journal.pgen.1007220), 2018-04-19

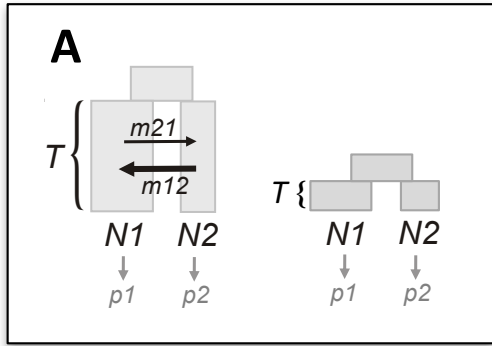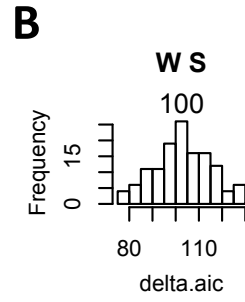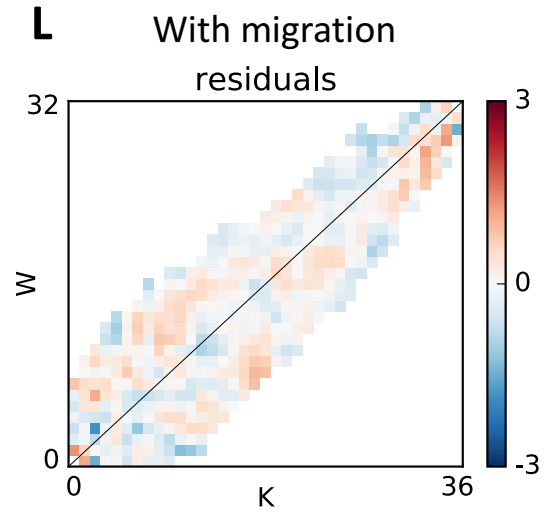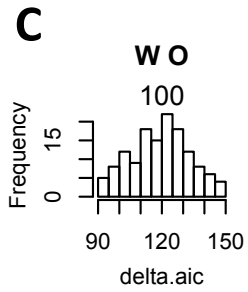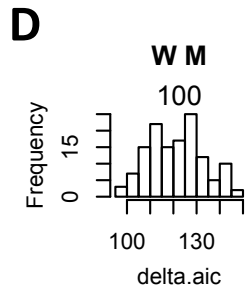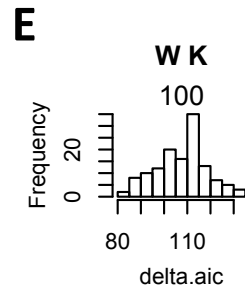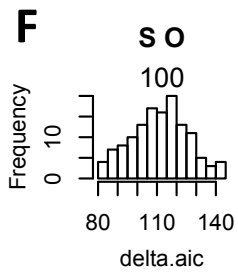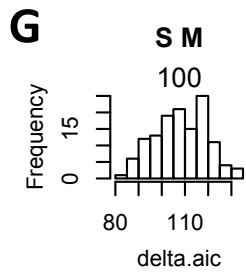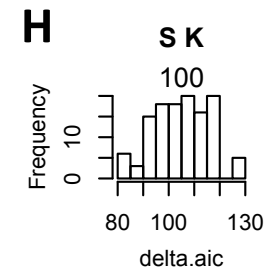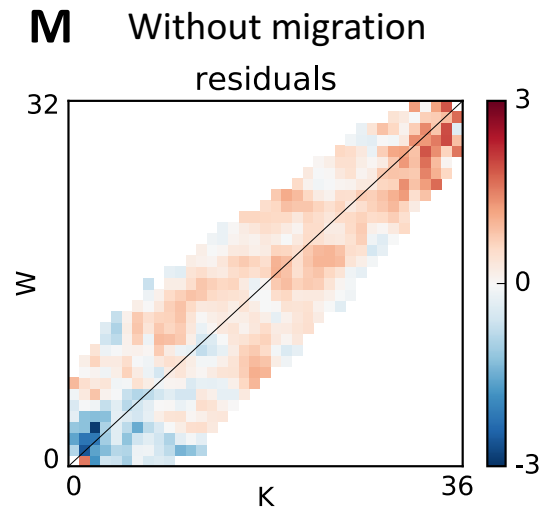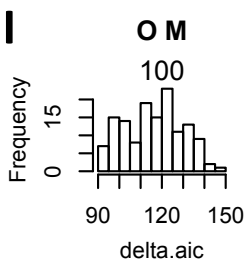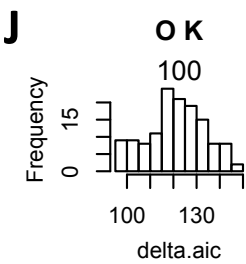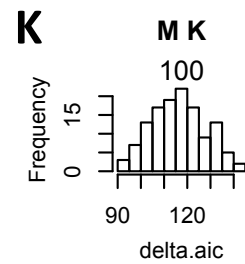

Supplement: pgen.1007220.s004.pdf [file pgen.1007220.s004.pdf]
